# Supplementary material for: Genome-wide DNA methylation-analysis delineates blastic plasmacytoid dendritic cell neoplasm from related entities and identifies distinct molecular features
Source: bioRxiv or medRxiv preprint supplement (doi:10.1101/2023.07.28.23293273), 2023-08-04

C1

C2

Proportion

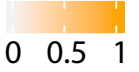

Site of biopsy

- Adipose tissue
- Bonemarrow
- Lymphnode
- Mucous membrane
- Skin

Gender

- female
- male

TMB

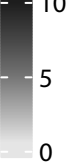

Site of biopsy

Gender

TMB

DC1

DC2

DC3

DC4

DC5

DC6

Mono1

Mono2

Mono3

Mono4

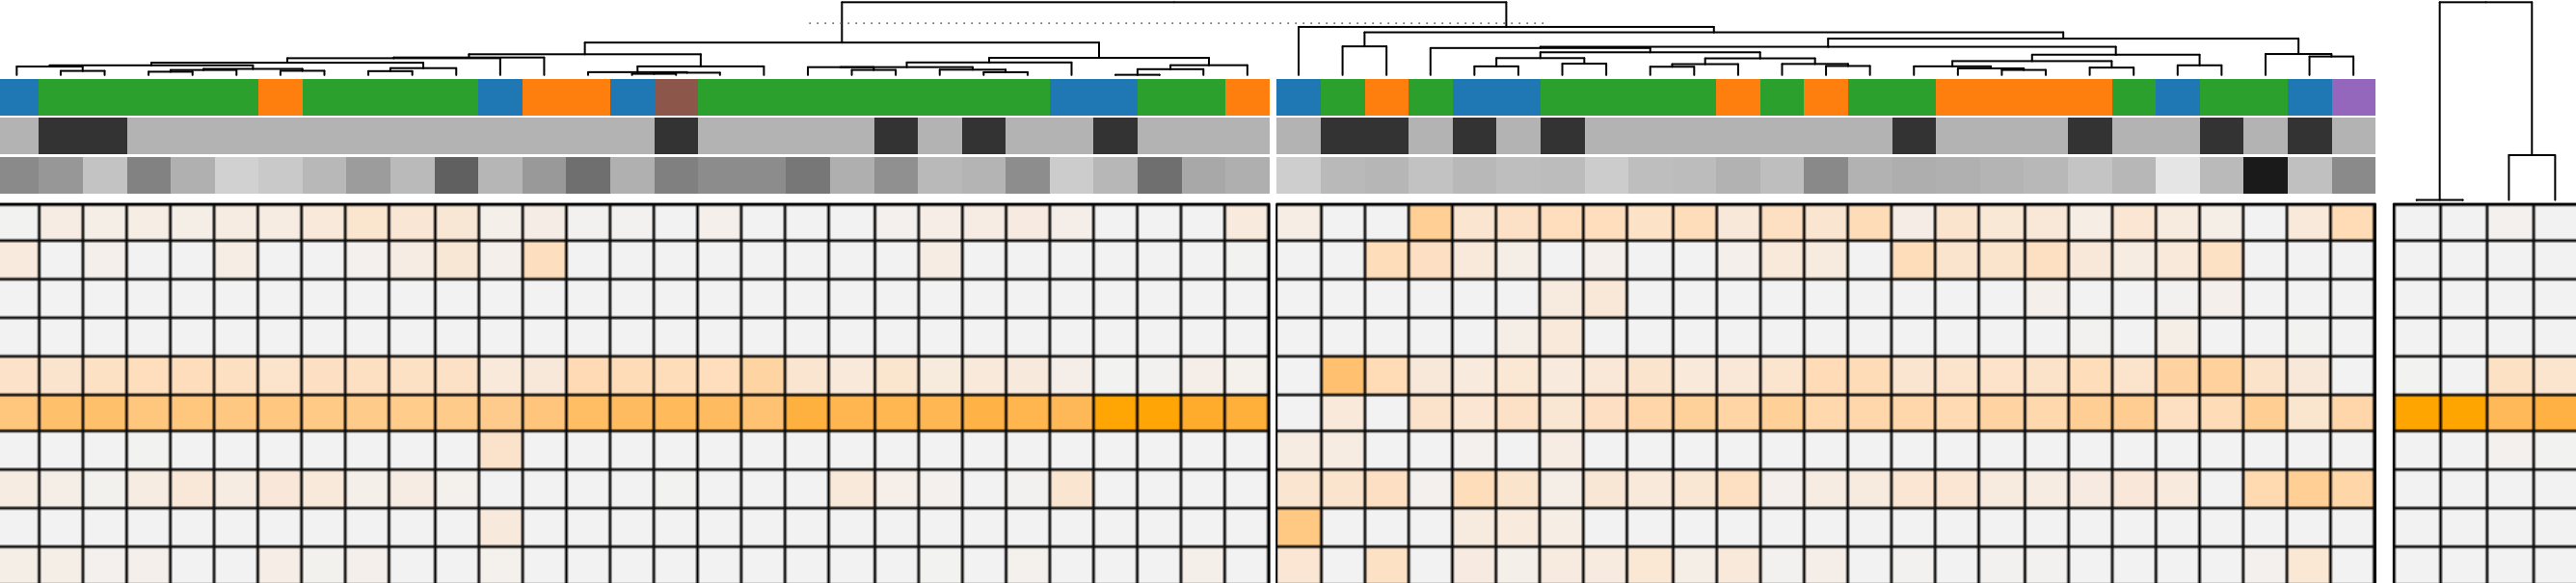

Supplement: Supplementary file [file media-1.pdf]
