# Supplementary material for: Genome-wide DNA methylation-analysis delineates blastic plasmacytoid dendritic cell neoplasm from related entities and identifies distinct molecular features
Source: bioRxiv or medRxiv preprint supplement (doi:10.1101/2023.07.28.23293273), 2023-08-04

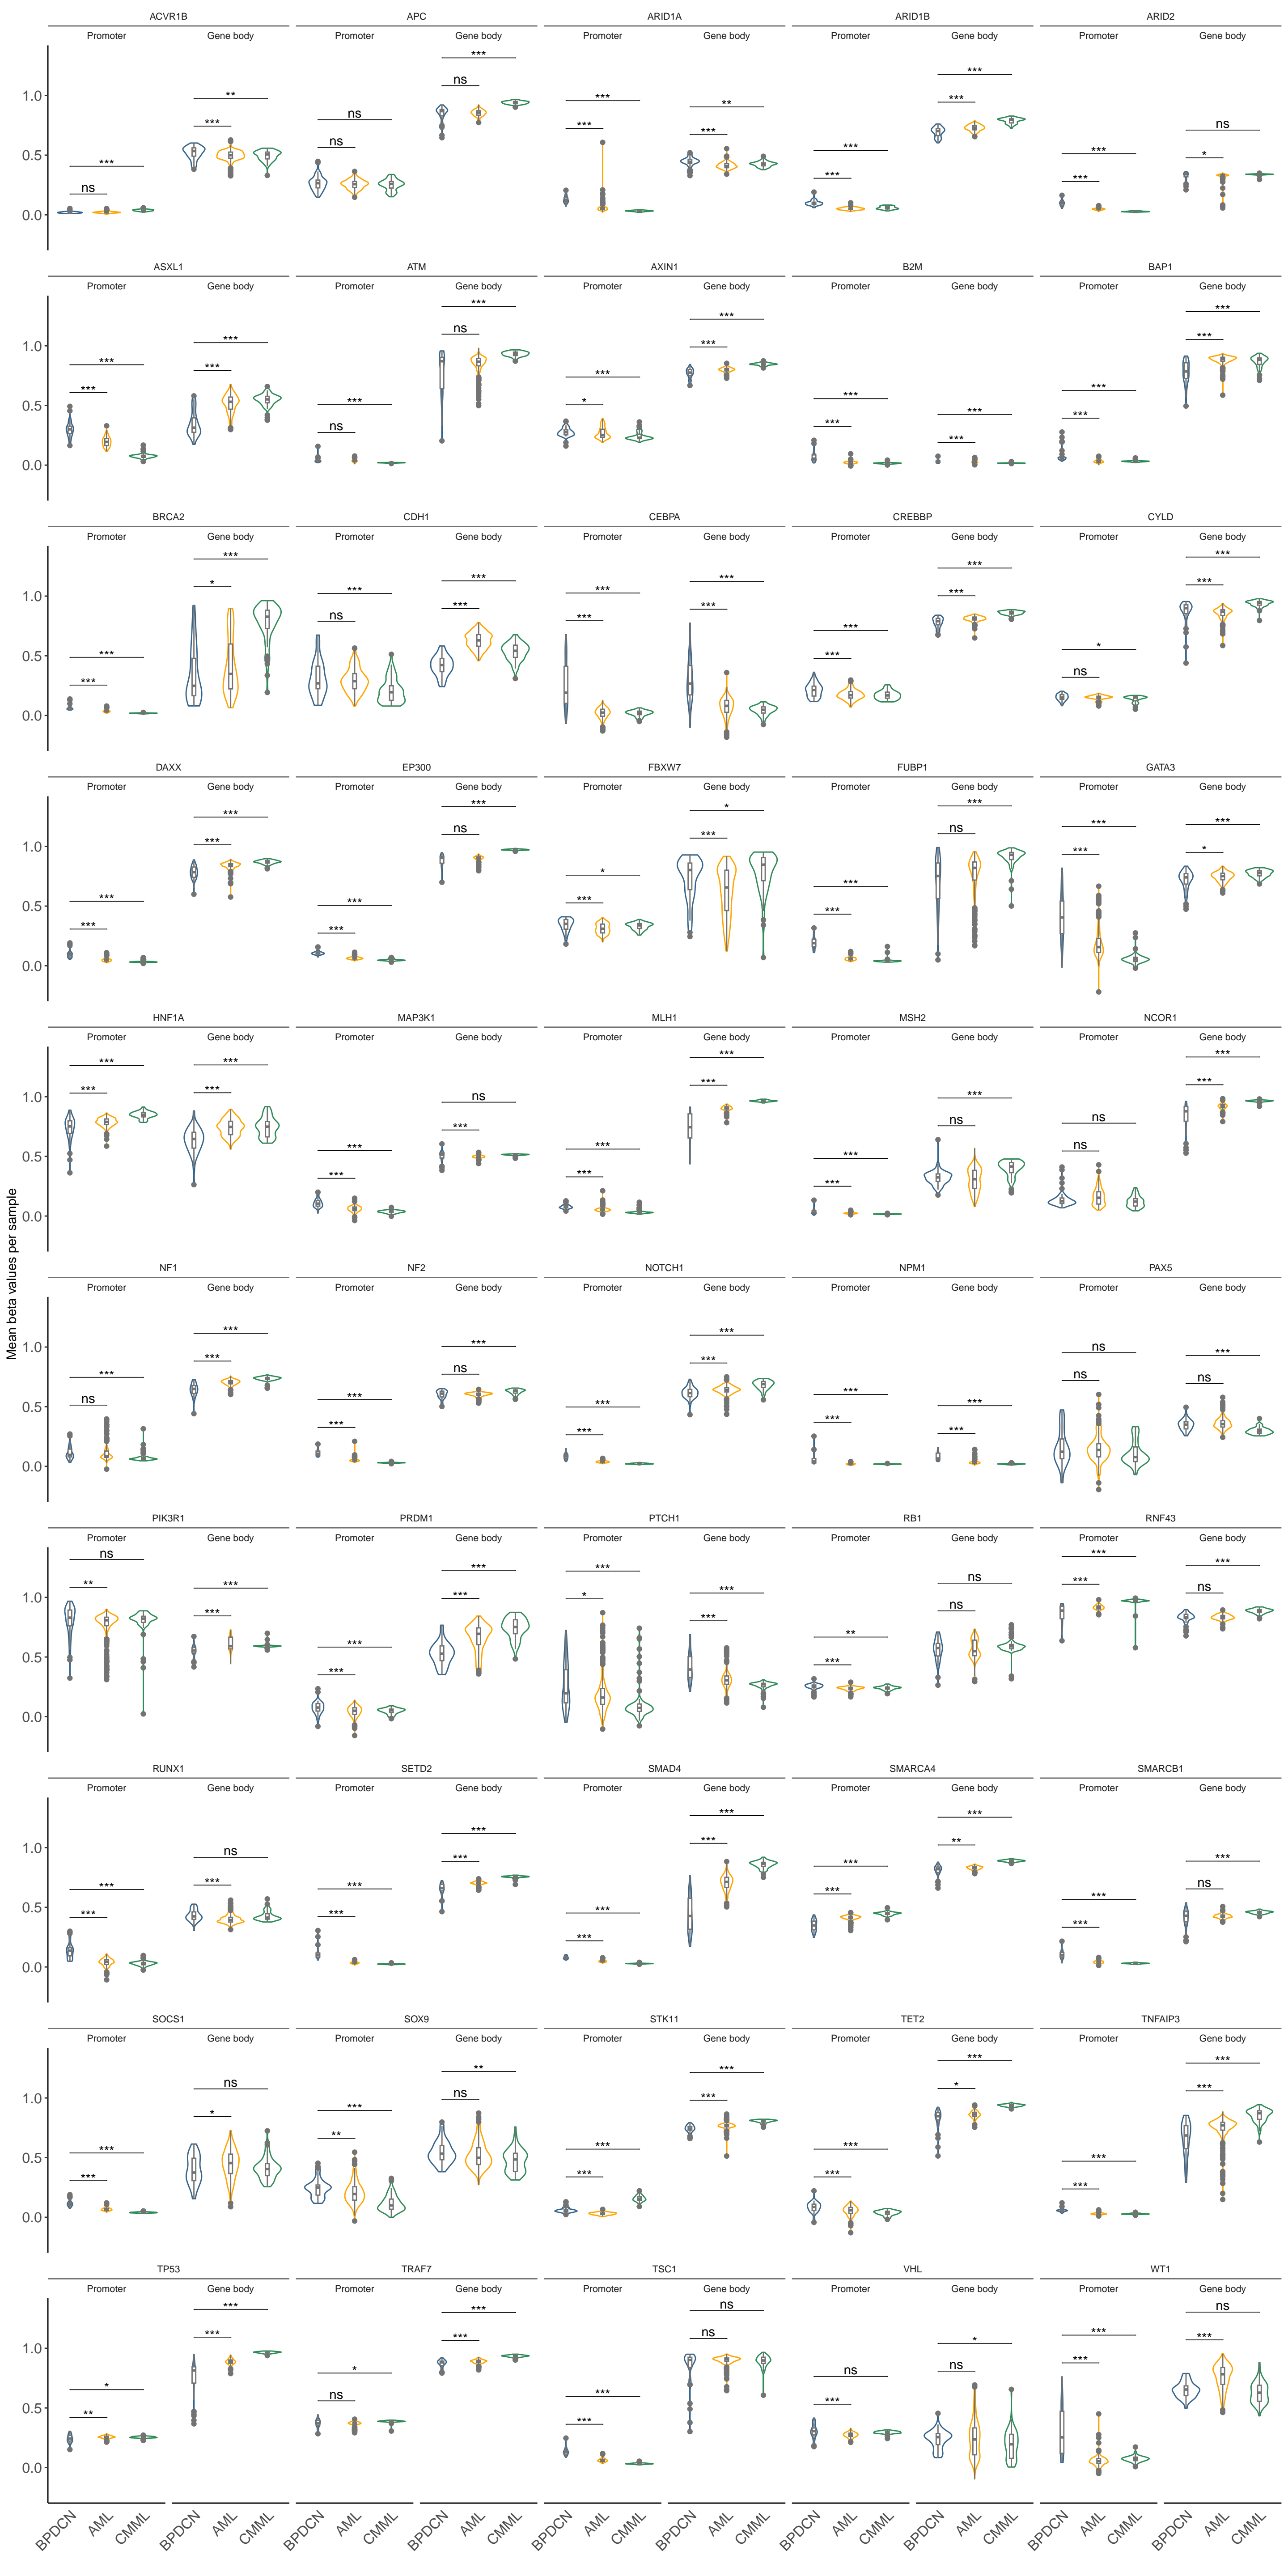

Supplement: Supplementary file [file media-2.pdf]
